# Supplementary material for: The Eating Disorders Genetics Initiative (EDGI) United Kingdom
Source: bioRxiv or medRxiv preprint supplement (doi:10.1101/2022.11.11.22282083), 2022-11-14
Supplement: Supplementary file [file media-2.pdf]

Eating Disorders Genetics  
Initiative (EDGI) United  
Kingdom: Sign-up  
Questionnaire

## Contents

|                                                                              | <b>Page</b> |
|------------------------------------------------------------------------------|-------------|
| <b>Introduction</b>                                                          | 3           |
| <b>Section 1:</b> Demographics and personal information                      | 3           |
| <b>Section 2:</b> ED100K Questionnaire                                       | 18          |
| <b>Section 3:</b> Night Eating Syndrome Questionnaire                        | 36          |
| <b>Section 4:</b> Muscle Dysmorphic Disorder Inventory                       | 40          |
| <b>Section 5:</b> Avoidant/restrictive Food Intake Disorder Screener         | 41          |
| <b>Section 6:</b> Childhood Trauma and Possible Stresses and Strains of Life | 42          |
| <b>Section 7:</b> Study Feedback                                             | 44          |

## 0 - Introduction

### Questions about your experiences in relation to mental health

Thank you for taking the time to assist us in our research. To make it easier for you to participate, you can start the questionnaire, log off and return to it later.

We are interested in knowing more about your mental health. Some of the questions are sensitive and may be difficult to answer. Please try to answer as many questions as you can and give the most accurate answers possible. However, if you cannot answer a question, you can always choose the “don’t know” or “prefer not to answer” option where available, or skip the question and move on.

**If you are concerned about answering these questions, it may be preferable to fill out this survey in the presence of someone who is able to give you support (e.g. a friend or family member).**

Information on where to find help for the issues covered in this questionnaire is given at the end of the survey.

Please note that this questionnaire will not be used to provide you with a diagnosis, your responses will only be used to assess your eligibility to take part in the Eating Disorders Genetics Initiative (EDGI).

If you would like to receive a formal diagnosis, please contact your GP. For more information and support on eating disorders, please visit the Beat website or visit the ‘Useful Links’ page on the EDGI website.

Please answer each question. If you are unsure, please give us your best guess or estimate.

Please do not use your browser's back button while taking this survey. If you need to return to a previous question, please use the back button at the bottom left corner of this survey.

## 1 – Demographics and personal information (Edited Common Subject Assessment)

### Questions about you and your medical history

These questions are about you and your medical health. There are no right or wrong answers. You can put "Don't know".

### Section 1 – Your Information

#### 1) Date of Birth

|                      |                      |                      |                      |                      |                      |
|----------------------|----------------------|----------------------|----------------------|----------------------|----------------------|
| <input type="text"/> | <input type="text"/> | <input type="text"/> | <input type="text"/> | <input type="text"/> | <input type="text"/> |
| DD                   | MM                   | YYYY                 |                      |                      |                      |

#### 1.1) How old are you now?

**If over 16, please continue to question 1.2. If under 16 participants will receive this message:**

Thank you for your interest in taking part in the Eating Disorders Genetics Initiative. We appreciate your support and willingness to take part in research.

We are currently only recruiting participants who are **16 or over** and who **live in England**. If you are under the age of 16 and would still like to take part in the BioResource as a volunteer, please contact [edgi@kcl.ac.uk](mailto:edgi@kcl.ac.uk).

Unfortunately, we are not currently recruiting participants **in other parts of the UK**. However, we will be expanding our research scope in due course.

You have received this message because you have confirmed that you are **under 16** or live **outside of England**. At this time, you are **not eligible** to take part in the EDGI, but if you live in the UK we will contact you when recruitment becomes available in your area. If you are currently under 16, please sign-up again when you have turned 16.

If you live **outside of England** however you attend an **NHS service within England**, please email or call us as you may still be eligible to take part.

**If you believe you have received this message by mistake, please contact the study team on FREEPHONE: 0800 917 6016 or via email to [EDGI@kcl.ac.uk](mailto:EDGI@kcl.ac.uk)**

**1.2) Please confirm where you are currently living or where your permanent address is based?**

- |                                                           |                                           |
|-----------------------------------------------------------|-------------------------------------------|
| <input type="checkbox"/> England (continue to question 2) | <input type="checkbox"/> Scotland         |
| <input type="checkbox"/> Wales                            | <input type="checkbox"/> Northern Ireland |
| <input type="checkbox"/> Outside UK                       |                                           |

**If participant selects anything other than England they will receive this message:**

Thank you for your interest in taking part in the Eating Disorders Genetics Initiative. We appreciate your support and willingness to take part in research.

We are currently only recruiting participants who are **16 or over** and who **live in England**.

Unfortunately, we are not currently recruiting participants **in other parts of the UK**. However, we will be expanding our research scope in due course.

You have received this message because you have confirmed that you are **under 16** or live **outside of England**. At this time, you are **not eligible** to take part in the EDGI, but if you live in the UK we will contact you when recruitment becomes available in your area. If you are currently under 16, please sign-up again when you have turned 16.

If you live **outside of England** however you attend an **NHS service within England**, please email or call us as you may still be eligible to take part.

If you believe you have received this message by mistake, please contact the study team on FREEPHONE:0800 917 6016 or via email to EDGI@kcl.ac.uk

**1.3 Have you previously taken part in the Genetic Links to Anxiety and Depression (GLAD) Study?**

Yes  No (skip to Q2)  Don't know (skip to Q2)

**1.4 Please state which email and phone number and postcode you used in order to sign up to the Genetic Links to Anxiety and Depression (GLAD) Study.**

Email: \_\_\_\_\_

Phone number: \_\_\_\_\_

Postcode: \_\_\_\_\_

**1.5 Have you already completed or will complete your Genetic Links to Anxiety and Depression (GLAD) Study saliva sample?**

*Please select "No" to receive a saliva sample in the post*

*Please select "Yes" if you have already provided or will provide a saliva sample, so that we do not send you a second saliva kit (each kit costs the study £10).*

Yes  No  Don't know

**1.4 Did you hear about EDGI through an NHS Trust, GP, talking therapy service, pharmacy, or any other healthcare provider?**

Yes (continue to Q1.5)  No (skip to Q2)

**1.5 Please specify which NHS Trust, GP or other healthcare provider you heard about EDGI from:**

Drop down menu with list of all Trusts/GPs, talking therapy services/ pharmacy/ healthcare provider, and Other (with a text box)

**2) What was your assigned sex at birth? (Note: This question refers to assigned sex at birth, not gender. Responses to this question are used to select questionnaire items that may be relevant to your medical history.)**

Male  Female

**2.1) Which gender do you identify with?**

Male  Female  Non-binary

Prefer to self-define (*please tell us more*) \_\_\_\_\_  Don't know  Prefer not to answer

**2.2) Do you identify as transgender?**

Yes  No

**3 is only displayed to those who selected 'female' in 2**

**3) Have you ever been pregnant?**

Yes  No

**4) What is your sexual orientation?**

Heterosexual  Homosexual  Bisexual  
 Asexual  Prefer to self-define (*please tell us more*) \_\_\_\_\_  
\_\_\_\_\_  Prefer not to say

**5) What is your current marital/relationship status?**

Single  Relationship (not living together)  Relationship (living together)  
 Married or Civil Partnership  Separated  Divorced  
 Widowed  Other  Prefer not to answer

**6 Do you have any children?**

Yes (Skip to question 6.1)  No (Continue to 7)

**6.1) How many children do you have?**

**6.2) For each of your children, please list their ages, their genders, their relationship to you (e.g. biological, step, or adopted), and whether or not they live with you in the text box below.**

\_\_\_\_\_  
\_\_(will be displayed as tick boxes for gender and free text for age and relationship)\_\_\_\_\_  
\_\_\_\_\_

**7) How would you describe your vision?**

Normal (i.e. 20/20)  Corrected to normal (i.e. glasses)

Visually impaired

Prefer not to answer

**8) How would you describe your hearing?**

Normal

Corrected to normal (i.e. hearing aid)

Hearing impaired/Deaf

Prefer not to answer

**9) Which hand do you usually write with?**

Right hand

Left hand

I can write with both hands

Prefer not to answer

**10) Do you consider yourself to have a disability (seen or unseen)?**

Yes (*continue to 10.1*)

No

**10.1 Please tell us more about your disability if you would like to**

---

---

---

**11) How many years did you go to school? Please include pre-school (e.g. nursery), primary school, secondary school, college/sixth-form, university and post-university (postgraduate) education.**

**11.1) Which of the following qualifications do you have? (Please select all that apply)**

College or university degree

A levels/AS levels or equivalent

O levels/GCSEs or equivalent

CSEs or equivalent

NVQ or HND or HNC or equivalent

Other professional qualifications (e.g. nursing, teaching) \_\_\_\_\_

None of the above

**12) What is your current employment status?**

In paid employment or self-employed

Retired

Looking after home and/or family

Unable to work because of sickness or disability

Unemployed

Doing unpaid or voluntary work

Full or part-time student

None of the above

Prefer not to answer

## Section 2 – Your Origins

| <b>12. You</b>                                          |                                   |                          |                                        |
|---------------------------------------------------------|-----------------------------------|--------------------------|----------------------------------------|
| <b>What is your ethnic origin? Please tick ONE box:</b> |                                   |                          |                                        |
| <input type="checkbox"/>                                | White – British                   | <input type="checkbox"/> | Asian or Asian British - Pakistani     |
| <input type="checkbox"/>                                | White - Irish                     | <input type="checkbox"/> | Asian or Asian British - Chinese       |
| <input type="checkbox"/>                                | White – Irish Traveler            | <input type="checkbox"/> | Asian or Asian British - Bangladeshi   |
| <input type="checkbox"/>                                | White - German                    | <input type="checkbox"/> | Asian or Asian British - Sri Lanka     |
| <input type="checkbox"/>                                | White - French                    | <input type="checkbox"/> | Any other Asian background<br>_____    |
| <input type="checkbox"/>                                | White - Italian                   | <input type="checkbox"/> | Black or Black British - Caribbean     |
| <input type="checkbox"/>                                | White - Polish                    | <input type="checkbox"/> | Black or Black British – South African |
| <input type="checkbox"/>                                | White -Spanish                    | <input type="checkbox"/> | Black or Black British – Kenyan        |
| <input type="checkbox"/>                                | White – other _____               | <input type="checkbox"/> | Black or Black British – Nigerian      |
| <input type="checkbox"/>                                | Mixed – White and Black Caribbean | <input type="checkbox"/> | Black or Black British – Ghanaian      |
| <input type="checkbox"/>                                | Mixed – White and Black African   | <input type="checkbox"/> | Black or Black British – Ugandan       |
| <input type="checkbox"/>                                | Mixed – White and Asian           | <input type="checkbox"/> | Black or Black British – Nigerian      |
| <input type="checkbox"/>                                | Other Mixed Background<br>_____   | <input type="checkbox"/> | Any other black background<br>_____    |
| <input type="checkbox"/>                                | Asian or Asian British - Indian   | <input type="checkbox"/> | Arab                                   |
| Please answer below:                                    |                                   |                          |                                        |
| <b>12a. Your first language(s)</b>                      |                                   |                          |                                        |
| _____                                                   |                                   |                          |                                        |



### Section 3 –Your Medical History

The next questions are about height and weight.

If you are concerned about answering these questions, it may be preferable to fill out this survey in the presence of someone who is able to give you support (e.g. a friend or family member).

Information on where to find help for the issues covered in this questionnaire is given at the end of the survey.

13) Please select your preferred units of measure.

Feet/Inches & Pounds

Centimeters & Kilograms

Body Mass Index (BMI)

13a) What is your height?

cm /  ft  in

**Question 13b will only display to those who selected Feet/Inches & Pounds or Centimeters & Kilograms in question 13**

13b) How much do you weigh?

.  kg /  st  lb

*If you are pregnant, please provide your weight before you were pregnant.*

**Question 13c will only display to those who selected Body Mass Index in question 13**

13c) What is your BMI?

.  bmi

**Question 14a will only display to those who selected Feet/Inches & Pounds or Centimeters & Kilograms in question 13**

14a) What is the most you have ever weighed (except during pregnancy, if female)?

.  kg /  st  lb

*If you were pregnant, please provide your weight before you were pregnant.*

**Question 14b will only display to those who selected Body Mass Index in question 13**

14b) What is your highest lifetime BMI?

.bmi

15) How old were you when you were at your highest weight/BMI?

**Question 16a will only display to those who selected Feet/Inches & Pounds or Centimeters & Kilograms in question 13**

16a) What is the least you have ever weighed since reaching your adult height? (*When you stopped growing*)

. kg /  st  lb

**Question 16b will only display to those who selected Body Mass Index in question 13**

16b) What is the lowest your BMI has ever been since reaching your adult height? (*When you stopped growing*)

.bmi

17) How old were you when you were at your lowest weight/BMI at your adult height? (*When you stopped growing*)

**Question 18 will only display to those who select "female" in question 2**

18) Have you had your first period?

Yes (*continue to 18a*)

No (*skip to question 19*)

18a) How old were you when you had your first period?

19) Has the doctor ever told you that you were overweight? (Do not include times during pregnancy)

Yes (*continue to 19b*)

No (*skip to 20*)

Don't know (*skip to 20*)

**19a) Please select what ages (in years) that you were overweight. (Please select all that apply)**

You can tick more than one box.

- |                                                         |                                                    |
|---------------------------------------------------------|----------------------------------------------------|
| <input type="checkbox"/> Young child (10 years or less) | <input type="checkbox"/> Adult (41-50 years)       |
| <input type="checkbox"/> Teenager (11-19 years)         | <input type="checkbox"/> Older adult (51-60 years) |
| <input type="checkbox"/> Young adult (20-30 years)      | <input type="checkbox"/> Older adult (61-70 years) |
| <input type="checkbox"/> Adult (31-40 years)            | <input type="checkbox"/> Older adult (71+ years)   |

**20) Do you have a specific diet?**

- |                                      |                                      |
|--------------------------------------|--------------------------------------|
| <input type="checkbox"/> No          | <input type="checkbox"/> Vegetarian  |
| <input type="checkbox"/> Vegan       | <input type="checkbox"/> Pescatarian |
| <input type="checkbox"/> Other _____ |                                      |

**21) Have you ever been diagnosed with the following illnesses?**

|                                |                                                                  | Yes                      | No                       | Year diagnosed |
|--------------------------------|------------------------------------------------------------------|--------------------------|--------------------------|----------------|
| <b>Mental Health Disorders</b> | Depression                                                       | <input type="checkbox"/> | <input type="checkbox"/> |                |
|                                | Depression during or after pregnancy                             | <input type="checkbox"/> | <input type="checkbox"/> |                |
|                                | Mania, hypomania, bipolar or manic-depression                    | <input type="checkbox"/> | <input type="checkbox"/> |                |
|                                | Anxiety, nerves or generalised anxiety disorder                  | <input type="checkbox"/> | <input type="checkbox"/> |                |
|                                | Social anxiety disorder or social phobia                         | <input type="checkbox"/> | <input type="checkbox"/> |                |
|                                | Specific phobia (e.g. fear of flying)                            | <input type="checkbox"/> | <input type="checkbox"/> |                |
|                                | Agoraphobia                                                      | <input type="checkbox"/> | <input type="checkbox"/> |                |
|                                | Panic attacks or panic disorder                                  | <input type="checkbox"/> | <input type="checkbox"/> |                |
|                                | Post-traumatic stress disorder (PTSD)                            | <input type="checkbox"/> | <input type="checkbox"/> |                |
|                                | Obsessive-compulsive disorder (OCD)                              | <input type="checkbox"/> | <input type="checkbox"/> |                |
|                                | Body Dysmorphic disorder (BDD)                                   | <input type="checkbox"/> | <input type="checkbox"/> |                |
|                                | Other obsessive-compulsive related disorders (e.g. skin-picking) | <input type="checkbox"/> | <input type="checkbox"/> |                |
| Schizophrenia                  | <input type="checkbox"/>                                         | <input type="checkbox"/> |                          |                |

|                                      |                                                                              |                          |                          |  |
|--------------------------------------|------------------------------------------------------------------------------|--------------------------|--------------------------|--|
|                                      | Any other type of psychotic illness                                          | <input type="checkbox"/> | <input type="checkbox"/> |  |
|                                      | Personality disorder (show Q21a)                                             | <input type="checkbox"/> | <input type="checkbox"/> |  |
|                                      | Autism spectrum disorder (ASD)                                               | <input type="checkbox"/> | <input type="checkbox"/> |  |
|                                      | Attention deficit or attention deficit and hyperactivity disorder (ADD/ADHD) | <input type="checkbox"/> | <input type="checkbox"/> |  |
| <b>Nervous System Problems</b>       | Epilepsy or convulsions                                                      | <input type="checkbox"/> | <input type="checkbox"/> |  |
|                                      | Brain tumour                                                                 | <input type="checkbox"/> | <input type="checkbox"/> |  |
|                                      | Migraine                                                                     | <input type="checkbox"/> | <input type="checkbox"/> |  |
|                                      | Multiple sclerosis                                                           | <input type="checkbox"/> | <input type="checkbox"/> |  |
|                                      | Parkinson's disease                                                          | <input type="checkbox"/> | <input type="checkbox"/> |  |
|                                      | Severe memory loss (like Alzheimer's disease)                                | <input type="checkbox"/> | <input type="checkbox"/> |  |
| <b>Allergies</b>                     | Hay fever                                                                    | <input type="checkbox"/> | <input type="checkbox"/> |  |
|                                      | Drug allergy<br>If yes, please put which drug:<br>_____                      | <input type="checkbox"/> | <input type="checkbox"/> |  |
|                                      | Food allergy<br>If yes, please provide details:<br>_____                     | <input type="checkbox"/> | <input type="checkbox"/> |  |
|                                      | Any other allergy<br>If yes, please specify: _____                           | <input type="checkbox"/> | <input type="checkbox"/> |  |
| <b>Bone or Joint Problems</b>        | Osteoporosis or "thin" bones                                                 | <input type="checkbox"/> | <input type="checkbox"/> |  |
|                                      | Osteoarthritis                                                               | <input type="checkbox"/> | <input type="checkbox"/> |  |
|                                      | Rheumatoid arthritis                                                         | <input type="checkbox"/> | <input type="checkbox"/> |  |
|                                      | Hypermobility (Ehlers-Danlos syndrome)                                       | <input type="checkbox"/> | <input type="checkbox"/> |  |
|                                      | Ankylosing spondylitis                                                       | <input type="checkbox"/> | <input type="checkbox"/> |  |
|                                      | Other arthritis                                                              | <input type="checkbox"/> | <input type="checkbox"/> |  |
| <b>Lung or Breathing Problems</b>    | Asthma                                                                       | <input type="checkbox"/> | <input type="checkbox"/> |  |
|                                      | Emphysema or chronic bronchitis                                              | <input type="checkbox"/> | <input type="checkbox"/> |  |
| <b>Heart or Circulation Problems</b> | Heart attack, angina                                                         | <input type="checkbox"/> | <input type="checkbox"/> |  |
|                                      | High blood cholesterol                                                       | <input type="checkbox"/> | <input type="checkbox"/> |  |
|                                      | High blood pressure                                                          | <input type="checkbox"/> | <input type="checkbox"/> |  |
|                                      | Atrial fibrillation                                                          | <input type="checkbox"/> | <input type="checkbox"/> |  |
|                                      | Paroxysmal tachycardia (POTS)                                                | <input type="checkbox"/> | <input type="checkbox"/> |  |
|                                      | Stroke                                                                       | <input type="checkbox"/> | <input type="checkbox"/> |  |

|                                                    |                                                |                          |                          |  |
|----------------------------------------------------|------------------------------------------------|--------------------------|--------------------------|--|
| <b>Digestive problems</b>                          | Crohn's disease                                | <input type="checkbox"/> | <input type="checkbox"/> |  |
|                                                    | Ulcerative colitis                             | <input type="checkbox"/> | <input type="checkbox"/> |  |
|                                                    | Coeliac disease                                | <input type="checkbox"/> | <input type="checkbox"/> |  |
| <b>Diabetes</b>                                    | Diabetes type 1 (early onset)                  | <input type="checkbox"/> | <input type="checkbox"/> |  |
|                                                    | Diabetes type 2 (late onset)                   | <input type="checkbox"/> | <input type="checkbox"/> |  |
|                                                    | Pain due to diabetes (Diabetic neuropathy)     | <input type="checkbox"/> | <input type="checkbox"/> |  |
|                                                    |                                                | <input type="checkbox"/> | <input type="checkbox"/> |  |
| <b>Cancer</b>                                      | Breast cancer                                  | <input type="checkbox"/> | <input type="checkbox"/> |  |
|                                                    | Lung cancer                                    | <input type="checkbox"/> | <input type="checkbox"/> |  |
|                                                    | Stomach cancer                                 | <input type="checkbox"/> | <input type="checkbox"/> |  |
|                                                    | Colon cancer                                   | <input type="checkbox"/> | <input type="checkbox"/> |  |
|                                                    | Uterus cancer                                  | <input type="checkbox"/> | <input type="checkbox"/> |  |
|                                                    | Prostate cancer                                | <input type="checkbox"/> | <input type="checkbox"/> |  |
| <b>Skin problems</b>                               | Psoriasis                                      | <input type="checkbox"/> | <input type="checkbox"/> |  |
|                                                    | Vitiligo                                       | <input type="checkbox"/> | <input type="checkbox"/> |  |
|                                                    | Pain due to virus (Post herpetic neuralgia)    |                          |                          |  |
|                                                    | Eczema                                         | <input type="checkbox"/> | <input type="checkbox"/> |  |
| <b>Endocrine system problems</b>                   | Thyroid disease<br>If Yes, please specify_____ | <input type="checkbox"/> | <input type="checkbox"/> |  |
| <b>Put Other Illnesses <u>NOT</u> Listed Above</b> | 1.                                             | <input type="checkbox"/> | <input type="checkbox"/> |  |
|                                                    | 2.                                             | <input type="checkbox"/> | <input type="checkbox"/> |  |
|                                                    | 3.                                             | <input type="checkbox"/> | <input type="checkbox"/> |  |

**21a) Which personality disorder have you been diagnosed with?**

- |                                                                                                      |                                                                    |
|------------------------------------------------------------------------------------------------------|--------------------------------------------------------------------|
| <input type="checkbox"/> Paranoid personality disorder                                               | <input type="checkbox"/> Narcissistic personality disorder         |
| <input type="checkbox"/> Schizoid personality disorder                                               | <input type="checkbox"/> Avoidant/anxious personality disorder     |
| <input type="checkbox"/> Schizotypal personality disorder                                            | <input type="checkbox"/> Dependent personality disorder            |
| <input type="checkbox"/> Antisocial personality disorder                                             | <input type="checkbox"/> Obsessive-compulsive personality disorder |
| <input type="checkbox"/> Emotionally unstable personality disorder (Borderline personality disorder) | <input type="checkbox"/> Don't know                                |
| <input type="checkbox"/> Histrionic personality disorder                                             | <input type="checkbox"/> Prefer not to answer                      |

22) Please tell us about any long-term medication that you are taking

| Name of medication | Type (tablets, inhaler etc.) | Reason |
|--------------------|------------------------------|--------|
|                    |                              |        |
|                    |                              |        |
|                    |                              |        |
|                    |                              |        |

23) Do you have metal implants anywhere in your body (excluding normal dental fillings) e.g. pacemakers, aneurysm clips, cochlear implants or have you suffered an injury involving metal fragments?

- Yes  No  
 Don't know

24) Tick the box that best describes you:

- I smoke now. (Skip to 24c)  I used to smoke. (Continue to 24a)  
 I have never smoked/vaped. (skip to 25)  I vape now. (skip to 24e)  
 I used to vape (skip to 24f)

24a) How many years has it been since you stopped smoking? (If you are not sure of the exact time, please provide an estimate)

24b) What year did you give up smoking?

24c) About how many cigarettes do you or did you smoke per day?

24d) How many years have you/did you smoke?

24e.) How many vaping sessions a day do you have? One session is indicated as 5 minutes, or 1 puff every 30 seconds.

- 10 or less     11-20  
 21-30         31 or more

**24f. How many years has it been since you stopped vaping? If you are not sure of the exact time, please provide an estimate).**

**24b What year did you give up vaping?**

**24c) About how many vaping sessions did you do per day? One session is indicated as 5 minutes, or 1 puff every 30 seconds.**

**25) How many hours per week are you exposed to other people's tobacco smoke? (*passive smoking*)**

**26) Do you consume alcohol?**

- Yes (continue to 26a)                       No (skip to 27)

**26a) Please give an approximate number of units you consume per week (1 pint of beer is 3 units and a small glass of wine is 1.5 units)**

## This is one unit of alcohol...

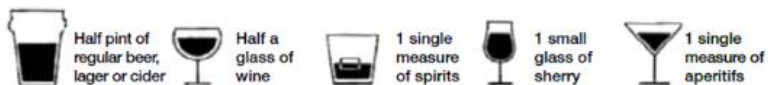

## ...and each of these is more than one

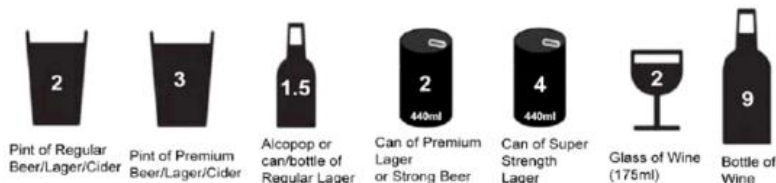

27) How many cups (or cans) of drinks with caffeine (coffee, tea, caffeinated drinks: e.g. Coke, Diet Coke, Red Bull, etc.) do you have per day?

28) Do you have trouble falling asleep at night or do you wake up in the middle of the night? *(If this varies a lot, answer this question in relation to the last 4 weeks)*

- Never/rarely                       Sometimes  
 Usually                                 Prefer not to answer

29) Are you concerned about your memory, because it affects how you work or the way you live from day to day?

- Yes (Continue to 27a)                       No (skip to question 30)

29a) If Yes, has your memory problem got worse in the last year?

- Yes                                       No                                       Don't know

## Section 3 –Your Family Medical History

28) How many brothers and sisters do you have? (Please include all blood relatives, both living and deceased - but not adopted relatives, stepchildren etc.)?

Half brothers      Half sisters

Full brothers      Full sisters

29) Do you have a twin brother or sister?

- Yes (continue to 29a)                       No (skip to 30)



**29a) Is your twin...**

Identical

Non-identical

Not known

**30.) Have any of your first-degree blood relatives (parents, siblings, children) ever been diagnosed with coronary artery disease or stroke?**

Yes

No (skip to Q31)

Don't know (Skip to Q31)

|                           |                                                  |         |                                 |         |
|---------------------------|--------------------------------------------------|---------|---------------------------------|---------|
| Mother                    | <input type="checkbox"/> Coronary artery disease | At age: | <input type="checkbox"/> Stroke | At age: |
| Father                    | <input type="checkbox"/> Coronary artery disease | At age: | <input type="checkbox"/> Stroke | At age: |
| Brother 1                 | <input type="checkbox"/> Coronary artery disease | At age: | <input type="checkbox"/> Stroke | At age: |
| Brother 2                 | <input type="checkbox"/> Coronary artery disease | At age: | <input type="checkbox"/> Stroke | At age: |
| Sister 1                  | <input type="checkbox"/> Coronary artery disease | At age: | <input type="checkbox"/> Stroke | At age: |
| Sister 2                  | <input type="checkbox"/> Coronary artery disease | At age: | <input type="checkbox"/> Stroke | At age: |
| Child 1<br>(son/daughter) | <input type="checkbox"/> Coronary artery disease | At age: | <input type="checkbox"/> Stroke | At age: |
| Child 2<br>(son/daughter) | <input type="checkbox"/> Coronary artery disease | At age: | <input type="checkbox"/> Stroke | At age: |

**31. Have any of your first-degree blood relatives (parents, siblings, children) ever been diagnosed with diabetes 1 or/and 2?**

Yes

No (skip to Q32)

Don't know (Skip to Q32)

| a. Please indicate which family member |                          | b. Please indicate approximate age in years at diagnosis | c. Did they receive uninterrupted insulin injections since diagnosis? |                             |                                     |
|----------------------------------------|--------------------------|----------------------------------------------------------|-----------------------------------------------------------------------|-----------------------------|-------------------------------------|
| Mother                                 | <input type="checkbox"/> | At age:                                                  | <input type="checkbox"/> Yes                                          | <input type="checkbox"/> No | <input type="checkbox"/> Don't know |
| Father                                 | <input type="checkbox"/> | At age:                                                  | <input type="checkbox"/> Yes                                          | <input type="checkbox"/> No | <input type="checkbox"/> Don't know |
| Brother 1                              | <input type="checkbox"/> | At age:                                                  | <input type="checkbox"/> Yes                                          | <input type="checkbox"/> No | <input type="checkbox"/> Don't know |
| Brother 2                              | <input type="checkbox"/> | At age:                                                  | <input type="checkbox"/> Yes                                          | <input type="checkbox"/> No | <input type="checkbox"/> Don't know |

|                           |                          |         |                              |                             |                                     |
|---------------------------|--------------------------|---------|------------------------------|-----------------------------|-------------------------------------|
| Sister 1                  | <input type="checkbox"/> | At age: | <input type="checkbox"/> Yes | <input type="checkbox"/> No | <input type="checkbox"/> Don't know |
| Sister 2                  | <input type="checkbox"/> | At age: | <input type="checkbox"/> Yes | <input type="checkbox"/> No | <input type="checkbox"/> Don't know |
| Child 1<br>(son/daughter) | <input type="checkbox"/> | At age: | <input type="checkbox"/> Yes | <input type="checkbox"/> No | <input type="checkbox"/> Don't know |
| Child 2<br>(son/daughter) | <input type="checkbox"/> | At age: | <input type="checkbox"/> Yes | <input type="checkbox"/> No | <input type="checkbox"/> Don't know |

**32. Have any of your first-degree blood relatives (parents, siblings, children) ever been diagnosed with cancer?**

Yes

No (skip to Section 2)

Don't know (Skip Section 2)

| a. Please indicate which family member |                          | b. Please indicate approximate age in years at diagnosis | c. Briefly indicate what type of cancer |
|----------------------------------------|--------------------------|----------------------------------------------------------|-----------------------------------------|
| Mother                                 | <input type="checkbox"/> | At age:                                                  | Type:                                   |
| Father                                 | <input type="checkbox"/> | At age:                                                  | Type:                                   |
| Brother 1                              | <input type="checkbox"/> | At age:                                                  | Type:                                   |
| Brother 2                              | <input type="checkbox"/> | At age:                                                  | Type:                                   |
| Sister 1                               | <input type="checkbox"/> | At age:                                                  | Type:                                   |
| Sister 2                               | <input type="checkbox"/> | At age:                                                  | Type:                                   |
| Child 1<br>(son/daughter)              | <input type="checkbox"/> | At age:                                                  | Type:                                   |
| Child 2<br>(son/daughter)              | <input type="checkbox"/> | At age:                                                  | Type:                                   |

## 2 - ED100K Questionnaire

### Section A: Some questions about your mental health

If you are concerned about answering these questions, it may be preferable to fill out this survey in the presence of someone who is able to give you support (e.g. a friend or family member).

Information on where to find help for the issues covered in this questionnaire is given at the end of the survey.

**A1) Have you ever suspected that you may have an eating disorder, whether or not you were ever diagnosed?**

Yes

No

Not sure

**A2) Have you ever received treatment for an eating disorder?**

Yes

No

**Question A3-4 will only display to those who select either “yes” or “not sure” in question A1 OR those who select “yes” to A2. Those who select “no” to both will skip to the next section**

**A3) Have you ever been diagnosed with one or more of the following eating disorders by a professional, even if you don’t have it currently?**

*By professional we mean: any doctor, nurse or person with specialist training (such as a psychologist, psychiatrist etc.) Please include disorders even if you did not need treatment for them or if you did not agree with the diagnosis.*

Anorexia nervosa

Atypical anorexia nervosa

Bulimia nervosa

Binge-eating disorder

Purging disorder

Night eating syndrome

Atypical bulimia  
nervosa

Atypical binge-eating  
disorder

Pica

Avoidant/restrictive food  
intake disorder

Rumination disorder

Other eating disorder  
\_\_\_\_\_

Don't know

Prefer not to say

A3a) Are you currently experiencing (answer from QA3) or have you experienced this eating disorder in the past?

| Anorexia nervosa                          | Current? | Past? |
|-------------------------------------------|----------|-------|
| Atypical anorexia nervosa                 |          |       |
| Binge-eating disorder                     |          |       |
| Atypical binge-eating disorder            |          |       |
| Bulimia nervosa                           |          |       |
| Atypical bulimia nervosa                  |          |       |
| Purging disorder                          |          |       |
| Night eating disorder                     |          |       |
| Pica                                      |          |       |
| Avoidant/restrictive food intake disorder |          |       |
| Rumination disorder                       |          |       |
| Other eating disorder                     |          |       |

**A4) Have you ever had a period of time when you weighed much less than other people thought you ought to weigh?**

Yes

No

Don't know

**Section B:** The following questions are about the time when you weighed much less than people thought you should weigh, were at a low weight, or when you had anorexia nervosa.

(Please note that 'low weight' is considered to be a BMI lower than 18.5)

If you are concerned about answering these questions, it may be preferable to fill out this survey in the presence of someone who is able to give you support (e.g. a friend or family member).

Information on where to find help for the issues covered in this questionnaire is given at the end of the survey.

**Section B is only displayed if the participant selected “Yes” to A4, selected “Anorexia nervosa” in A3 or has had a BMI of less than 18.5 (this could be current BMI or lowest ever BMI). If none of this applies participant will be skipped to section C.**

**B1) When you weighed much less than other people thought you ought to weigh or were at your lowest weight, was this due to an illness other than an eating disorder?**

Yes (*continue to B1a*)

No (*skip to B2*)

Don't know (*skip to B2*)

**B1a) What was the illness?**

---

**B2a is only displayed to those who selected ‘Feet, inches and pounds’ or ‘Centimeters and kilograms’ in 13**

**B2a) How low did your weight get during this time?**

.  kg   /    st    lb

**B2b is only displayed to those who selected ‘BMI’ in 13**

**B2b) How low did your BMI get during this time?**

. BMI

B3) How old were you?

B4) How tall were you then?

cm /  ft  in

B5) During the time when you were at this low weight/BMI, did you still feel fat?

- No  Slightly  Somewhat  
 Very  Extremely  Don't know/prefer not to say

B6) During the time when you were at this low weight/BMI, how afraid were you that you might gain weight or become fat?

- Not afraid  Slightly afraid  Somewhat afraid  
 Very afraid  Extremely afraid  Don't know/prefer not to say

B7) For how long did you have anorexia nervosa OR were at this low weight/BMI?

years  months

Don't know

B8) During the time when you were at this low weight/BMI, how dependent was your self-worth on your body shape or weight?

|                      |   |   |   |   |   |   |   |                      |
|----------------------|---|---|---|---|---|---|---|----------------------|
|                      | 1 | 2 | 3 | 4 | 5 | 6 | 7 |                      |
| Not at all dependent |   |   |   |   |   |   |   | Completely dependent |

|  |            |          |           |            |
|--|------------|----------|-----------|------------|
|  | Not at all | Somewhat | Very much | Don't know |
|--|------------|----------|-----------|------------|

|                                                                                                                                                                                                                |                          |                          |                          |                          |
|----------------------------------------------------------------------------------------------------------------------------------------------------------------------------------------------------------------|--------------------------|--------------------------|--------------------------|--------------------------|
| B9) Did you ever think your <u>low weight/BMI</u> had <u>negative consequences</u> for your health?                                                                                                            | <input type="checkbox"/> | <input type="checkbox"/> | <input type="checkbox"/> | <input type="checkbox"/> |
| B10) During the time when you were at this <u>low weight/BMI</u> , did you ever experience your body or parts of your body to be <u>larger</u> than they actually were or than other people thought they were? | <input type="checkbox"/> | <input type="checkbox"/> | <input type="checkbox"/> | <input type="checkbox"/> |

**B11 & B12 are only displayed to those who selected “Female” in question 2.  
Participants who selected “Male” in question 2 will skip to section D.**

**B11) Before this time had your periods already started?**

- Yes (*continue to B12*)       No (*skip to section D*)       Don't know (*continue to B12*)

**B12) Did your periods stop at any time during this time of low weight?**

- Yes (*continue to B13*)       No (*skip to section D*)       Don't know (*skip to section D*)

**B12.1) For how long (in years and months) did your periods stop?**

years     months

Don't know

**B12.2) Roughly how old were you (in years) when your periods stopped?**

Don't know

## Section C: The following questions are about any significant weight loss you have experienced in your life

If you are concerned about answering these questions, it may be preferable to fill out this survey in the presence of someone who is able to give you support (e.g. a friend or family member).

Information on where to find help for the issues covered in this questionnaire is given at the end of the survey.

**C1) Has there ever been a period when you have lost what you or others considered to be a significantly large amount of weight?**

- Yes (*continue to C1a*)  No (*skip to skip to section D*)  
 Don't know (*skip to C1a*)

**C1a) How much weight did you lose?**

.  kg /  st  lb

**C1b) How much did you weigh prior to this period of significant weight loss?**

.  kg /  st  lb

**C1c) Over what time period did this weight loss occur?**

- Up to 1 month  Between 1 month and 3 months  
 Between 3 months and 6 months  Up to 12 months

**If percentage of body weight lost is less than 5% in 1 month, 7.5% in 3 months, 10% in 6 months or 20% in 12 months this is classed as non-severe malnutrition and participants will be skipped to the next block. Participants who meet the criteria for severe malnutrition will continue to Question C2.**

**C2) During this period of significant weight loss was this due to an illness other than an eating disorder?**

- Yes (*continue to C2a*)  No (*Skip to C3*)  
 Don't know (*Skip to C3*)



**C2a) What was the illness?**

---

**C3) During this time of significant weight loss, did you still feel fat?**

- No                       Slightly                       Somewhat  
 Very                       Extremely                       Don't know/prefer not to say

**C4) During this time of significant weight loss, how afraid were you that you might gain weight or become fat?**

- Not afraid                       Slightly afraid                       Somewhat afraid  
 Very afraid                       Extremely afraid                       Don't know/prefer not to say

**C5) During this time of significant weight loss, how dependent was your self-worth on your body shape or weight?**

|                      |   |   |   |   |   |   |   |                      |
|----------------------|---|---|---|---|---|---|---|----------------------|
|                      | 1 | 2 | 3 | 4 | 5 | 6 | 7 |                      |
| Not at all dependent |   |   |   |   |   |   |   | Completely dependent |

|                                                                                                                                                                                                            | Not at all               | Somewhat                 | Very much                | Don't know               |
|------------------------------------------------------------------------------------------------------------------------------------------------------------------------------------------------------------|--------------------------|--------------------------|--------------------------|--------------------------|
| <b>C6) Did you ever think that this period of <u>significant weight loss</u> had <u>negative consequences</u> for your health?</b>                                                                         | <input type="checkbox"/> | <input type="checkbox"/> | <input type="checkbox"/> | <input type="checkbox"/> |
| <b>C7) During this time of <u>significant weight loss</u>, did you ever experience your body or parts of your body to be <u>larger</u> than they actually were or than other people thought they were?</b> | <input type="checkbox"/> | <input type="checkbox"/> | <input type="checkbox"/> | <input type="checkbox"/> |

**C8 & C9 are only displayed to those who selected “Female” in question 2. Participants who selected “Male” in question 2 will skip to section C.**

**C8) Before this time of significant weight loss had your periods already started?**

- Yes (*continue to C9*)                       No (*skip to section D*)                       Don't know (*continue to C9*)

**C9) Did your periods stop at any time during this time of significant weight loss?**

- Yes (*continue to C9.1*)                       No (*skip to section D*)                       Don't know (*skip to section D*)

**C9.1) For how long (*in years and months*) did your periods stop?**

years     months

C9.2) Roughly how old were you (*in years*) when your periods stopped?

**Section D: The following questions are about your eating habits**

If you are concerned about answering these questions, it may be preferable to fill out this survey in the presence of someone who is able to give you support (e.g. a friend or family member).

Information on where to find help for the issues covered in this questionnaire is given at the end of the survey.

D1) Have you ever had regular episodes of overeating or eating binges when you ate what most people would regard as an unusually large amount of food in a short period of time (for example, in a 2-hour period)?

- Yes (*continue to D2*)       No (*skip to section E*)       Don't know (*continue to D2*)

D2) When you were having regularly occurring episodes of binge eating or overeating, did you feel that your eating was out of control such that you felt you could not stop eating, or that you could not control what or how much you were eating?

- No (*skip to section E*)       Slightly (*Continue to D3*)       Somewhat (*Continue to D3*)  
 Very (*Continue to D3*)       Extremely (*Continue to D3*)       Prefer not to answer (*Continue to D3*)

|                                    |     |    |            |
|------------------------------------|-----|----|------------|
| D3) During eating binges, did you: | Yes | No | Don't Know |
|------------------------------------|-----|----|------------|

|                                                                                                                                                                             |                          |                          |                          |
|-----------------------------------------------------------------------------------------------------------------------------------------------------------------------------|--------------------------|--------------------------|--------------------------|
| a) Eat much more <u>rapidly</u> than usual?                                                                                                                                 | <input type="checkbox"/> | <input type="checkbox"/> | <input type="checkbox"/> |
| b) Eat until you felt <u>uncomfortably full</u> ?                                                                                                                           | <input type="checkbox"/> | <input type="checkbox"/> | <input type="checkbox"/> |
| c) Eat <u>large</u> amounts of food when you <u>didn't</u> feel physically hungry?                                                                                          | <input type="checkbox"/> | <input type="checkbox"/> | <input type="checkbox"/> |
| d) Eat <u>alone</u> because you were <u>embarrassed</u> by what/how much you were eating?                                                                                   | <input type="checkbox"/> | <input type="checkbox"/> | <input type="checkbox"/> |
| e) Feel <u>ashamed/disgusted</u> with yourself, <u>depressed</u> , or very <u>guilty</u> after overeating?                                                                  | <input type="checkbox"/> | <input type="checkbox"/> | <input type="checkbox"/> |
| f) Feel like you had <u>no control</u> over your eating (e.g. not being able to <u>stop</u> eating, feeling <u>compelled</u> to eat or going back and forth for more food)? | <input type="checkbox"/> | <input type="checkbox"/> | <input type="checkbox"/> |
| g) Make yourself <u>vomit</u> as a means to <u>control</u> your weight and shape?                                                                                           | <input type="checkbox"/> | <input type="checkbox"/> | <input type="checkbox"/> |

D4 is only displayed to those who selected “yes” for the corresponding statements in D3. Participants who select “no” for all the statements in D3 will skip to question D5.

| D4) If yes, <u>how often</u> did you:                                                                                                                                       | Rarely                   | Sometimes                | Often                    | Always                   |
|-----------------------------------------------------------------------------------------------------------------------------------------------------------------------------|--------------------------|--------------------------|--------------------------|--------------------------|
| a) Eat much more <u>rapidly</u> than usual?                                                                                                                                 | <input type="checkbox"/> | <input type="checkbox"/> | <input type="checkbox"/> | <input type="checkbox"/> |
| b) Eat until you felt <u>uncomfortably full</u> ?                                                                                                                           | <input type="checkbox"/> | <input type="checkbox"/> | <input type="checkbox"/> | <input type="checkbox"/> |
| c) Eat <u>large</u> amounts of food when you didn't <u>feel physically hungry</u> ?                                                                                         | <input type="checkbox"/> | <input type="checkbox"/> | <input type="checkbox"/> | <input type="checkbox"/> |
| d) Eat <u>alone</u> because you were <u>embarrassed</u> by what/how much you were eating?                                                                                   | <input type="checkbox"/> | <input type="checkbox"/> | <input type="checkbox"/> | <input type="checkbox"/> |
| e) Feel <u>ashamed/disgusted</u> with yourself, <u>depressed</u> , or <u>very guilty</u> after overeating?                                                                  | <input type="checkbox"/> | <input type="checkbox"/> | <input type="checkbox"/> | <input type="checkbox"/> |
| f) Feel like you had <u>no control</u> over your eating (e.g. not being able to <u>stop</u> eating, feeling <u>compelled</u> to eat or going back and forth for more food)? | <input type="checkbox"/> | <input type="checkbox"/> | <input type="checkbox"/> | <input type="checkbox"/> |
| g) Make yourself <u>vomit</u> as a means to <u>control</u> your weight and shape?                                                                                           | <input type="checkbox"/> | <input type="checkbox"/> | <input type="checkbox"/> | <input type="checkbox"/> |

D5) Do you/did you feel distressed about your episodes of overeating?

Yes (*continue to D5a*)

No (*skip to D6*)

D5a) How distressed did binge eating usually make you feel?

Slightly

Somewhat

Very

Extremely

Don't know/prefer not to say

D6) When you were having regularly occurring episodes of binge eating, how many episodes would you usually experience in one week?

(*continue to C6a if less than 1, skip to C7 if more than 1*)

D6a) How many episodes of binge eating would you usually experience in one month?

(*continue to C6b if less than 1, skip to C7 if more than 1*)

D6b) How many episodes of binge eating would you usually experience in one year?

D7) For how long did you experience regularly occurring binge eating episodes?

years

months

Don't know

D8) During the time when you were binge eating, how dependent was your self-worth on your body shape or weight?

|                      | 1 | 2 | 3 | 4 | 5 | 6 | 7 |                      |
|----------------------|---|---|---|---|---|---|---|----------------------|
| Not at all dependent |   |   |   |   |   |   |   | Completely dependent |

D9) Roughly how old were you when you began having regular episodes of binge eating?

years

Don't know

D10) How old were you when the regular episodes of binge eating stopped?

years      OR

I still have regularly occurring episodes of binge-eating

Don't know

**D11 is only displayed to those who were also asked to answer section B (the low weight section).**

D11) Did you experience regular episodes of binge eating while at your lowest weight?

Yes, only during times of low weight

Yes, at times of low weight and at times outside of low weight

No

**Section E: The following questions are about compensatory behaviors**

If you are concerned about answering these questions, it may be preferable to fill out this survey in the presence of someone who is able to give you support (e.g. a friend or family member).

Information on where to find help for the issues covered in this questionnaire is given at the end of the survey.

E1) Have you ever used any of the following to control your body shape or weight?

|                                                                                                                    | Never                    | A few times, but it never became a habit | Yes, often               |
|--------------------------------------------------------------------------------------------------------------------|--------------------------|------------------------------------------|--------------------------|
| a) Made yourself <u>vomit</u>                                                                                      | <input type="checkbox"/> | <input type="checkbox"/>                 | <input type="checkbox"/> |
| b) Used <u>laxatives (including pills or liquids meant to stimulate bowel movements)</u>                           | <input type="checkbox"/> | <input type="checkbox"/>                 | <input type="checkbox"/> |
| c) Used <u>diuretics (water pills)</u>                                                                             | <input type="checkbox"/> | <input type="checkbox"/>                 | <input type="checkbox"/> |
| d) Used <u>diet pills (over the counter or prescription)</u>                                                       | <input type="checkbox"/> | <input type="checkbox"/>                 | <input type="checkbox"/> |
| e) Exercised <u>excessively</u> (e.g. felt compelled to exercise, felt uneasy or distressed if unable to exercise) | <input type="checkbox"/> | <input type="checkbox"/>                 | <input type="checkbox"/> |
| f) <u>Fasted</u> or did not eat (for 8 waking hours or more)                                                       | <input type="checkbox"/> | <input type="checkbox"/>                 | <input type="checkbox"/> |
| g) Other                                                                                                           | <input type="checkbox"/> | <input type="checkbox"/>                 | <input type="checkbox"/> |

E2 is only displayed to those who selected “yes” in question E1.

E2) Have you ever used any of the following to compensate for episodes of binge eating or overeating? (Mark all that apply)

|                                                                                                                               | Yes                      | No                       |
|-------------------------------------------------------------------------------------------------------------------------------|--------------------------|--------------------------|
| a) Made yourself <u>vomit</u>                                                                                                 | <input type="checkbox"/> | <input type="checkbox"/> |
| b) Laxatives (including <u>pills</u> or <u>liquids</u> meant to <u>stimulate</u> bowel movements)                             | <input type="checkbox"/> | <input type="checkbox"/> |
| c) Diuretics ( <u>water pills</u> )                                                                                           | <input type="checkbox"/> | <input type="checkbox"/> |
| d) Weight loss pills ( <u>over the counter</u> or <u>prescription</u> )                                                       | <input type="checkbox"/> | <input type="checkbox"/> |
| e) <u>Excessive</u> exercise (e.g. feel <u>compelled</u> to exercise, feel uneasy or distressed if <u>unable</u> to exercise) | <input type="checkbox"/> | <input type="checkbox"/> |
| f) Fasting ( <u>not eating</u> for <u>8</u> waking hours or more)                                                             | <input type="checkbox"/> | <input type="checkbox"/> |
| g) Other methods _____ (text box)_____                                                                                        | <input type="checkbox"/> | <input type="checkbox"/> |

E3 is only displayed to those who select “Yes” to “Other methods” in E2

E3) Please state any other methods used to compensate for episodes of binge eating or overeating.

---

E4 is only displayed to those who select “Yes” to D1

E4) Did you ever have periods of time that lasted three months or more when you had binge-eating episodes without regularly engaging in any of the following: making yourself vomit, laxative use, diuretic use, taking weight loss pills, excessively exercising (e.g. feel compelled to exercise, feel uneasy or distressed if unable to exercise), or fasting (not eating for 8 waking hours or more)?

- There were periods of time that lasted 3 months or more when I was binge eating when I DID NOT engage in any of the above methods to control my weight or shape.
- There were periods of time that lasted 3 months or more when I was binge eating when I DID engage in at least one of the above methods to control my weight or shape.
- Don't know

E5-6 are only displayed to those who select “Yes” to D1 and selected any of the compensatory behaviours in E2

E5) Did the binge eating and compensatory behaviours occur at the same time, on average, once a week for 3 months?

- Yes, there have been periods when I engaged in binge eating and compensatory behaviors at the same time, on average, once a week for 3 months
- No
- Don't know

E6) Was there ever a time when you engaged in compensatory behaviors (making yourself vomit, laxative use, diuretic use, taking weight loss pills, excessively exercising) on average, once a week for 3 months when you were not binge eating?

- Yes**, there have been times when I engaged in compensatory behaviors when I was not binge eating.
- No**, at times when I engaged in any of the compensatory behaviors, I was always also binge eating.
- Don't know

E7 is only displayed to those who were also asked to answer section B (the low weight section).

E7) During the period of time when you were at your lowest weight, did you use any of the following as a way to control your weight or shape? (Mark all that apply).

- Making yourself vomit
- Fasting (*not eating for 8 waking hours or more*)
- Laxatives (including pulls or liquids meant to stimulate bowel movements)
- Diuretics (water pills)
- Weight loss pills
- Excessive exercise (*e.g. feel compelled to exercise, feel uneasy or distressed if unable to exercise*)
- Other methods
- None of the above

E8 is only displayed to those who select "Other methods" in E7

E8) Please state any other methods used to control your weight or shape.

---

E9 is only displayed to those who select "Making yourself vomit" in E1

E9) How old were you when you began self-inducing vomiting for the first time?

Don't know

E9.1) How often a week did you usually self-induce vomiting during these periods?



**(E9.2 is only displayed to participants who entered less than 1 in E9.1)**

E9.2) How often a month did you usually self-induce vomiting during these periods?

**(E9.3 is only displayed to participants who entered less than 1 in E9.2)**

E9.3) How often a year did you usually self-induce vomiting during these periods?

E9.4) For how long a period of time were you engaging in self-induced vomiting?

years      months

**E10 will only be displayed to those who selected 'Laxatives' in question E1**

E10) How old were you when you used laxatives for the first time?

E10.1) How often a week did you usually use laxatives during these periods?

**(E10.2 is only displayed to participants who entered less than 1 in E10.1)**

E10.2) How often a month did you usually use laxatives during these periods?

**(E10.3 is only displayed to participants who entered less than 1 in E10.2)**

E10.3) How often a year did you usually use laxatives during these periods?

E10.4) For how long a period of time were you using laxatives?

years   months

**E11 will only be displayed to those who selected 'Diuretics' in question E1**

E11) How old were you when you used diuretics for the first time?

E11.1) How often a week did you usually use diuretics during these periods?

**(E11.2 is only displayed to participants who entered less than 1 in E11.1)**

E11.2) How often a month did you usually use diuretics during these periods?

**(E11.3 is only displayed to participants who entered less than 1 in E11.2)**

E11.3) How often a year did you usually use diuretics during these periods?

E11.4) For how long a period of time were you using diuretics?

years   months

**E12 will only be displayed to those who selected 'Diet pills' in question E1**

E12) How old were you when you used diet pills for the first time?

E12.1) How often a week did you usually use diet pills during these periods?

**(E12.2 is only displayed to participants who entered less than 1 in E12.1)**

**E12.2) How often a month did you usually use diet pills during these periods?**

**(E12.3 is only displayed to participants who entered less than 1 in E12.2)**

**E12.3) How often a year did you usually use diet pills during these periods?**

**E12.4) For how long a period of time were you using diet pills?**

years      months

**E13-E18 will only be displayed to those who selected 'Excessive Exercise' in question E1**

**E13) Have you ever felt uneasy or distressed if unable to exercise?**

- Yes
- No
- Don't know

**E14) Have you ever felt compelled to exercise--like you had to do it--to control your body shape or weight?**

- Yes
- No
- Don't know

**E15) Have there been times when you declined opportunities to be with friends in order to exercise?**

- Yes
- No
- Don't know

**E16) Have you exercised despite an injury or illness that would have prevented others from exercising?**

- Yes
- No
- Don't know

**E17) Have there been times when you modified your diet/eating habits if you were unable to exercise for any reason?**

- Yes
- No
- Don't know

**E18) How old were you when you first exercised to control your weight and shape and felt either compelled to exercise or distressed if unable to exercise?**

**E18.1) For how long a period of time did you feel compelled to exercise or felt distressed if unable to exercise?**

years      months

Don't know

**E18.2) How often a week did you usually exercise during these periods?**

**(E18.3 is only displayed to participants who entered less than 1 in E18.2)**

**E18.3) How often a month did you usually exercise during these periods?**

**(E18.4 is only displayed to participants who entered less than 1 in E18.3)**

**E18.4) How often a year did you usually exercise during these periods?**

E18.4 How old were you when you first exercised to control your weight and shape AND felt either compelled to exercise or distressed if unable to exercise?

years months

Don't know

E18.5)

**E19 will only be displayed to those who selected 'Fasting' in question E1**

**E19) How old were you when you fasted for the first time? (*Fasting is not eating for 8 waking hours or more. Do not include fasting for religious purposes.*)**

Don't know

**E19.1) For what period of time did you engage in periods of fasting? Fasting is not eating for 8 waking hours or more.**

years months

**E19.2) How often a week did you usually fast during these periods?**

**(E19.3 is only displayed to participants who entered less than 1 in E19.2)**

**E19.3) How often a month did you usually fast during these periods?**

**(E19.4 is only displayed to participants who entered less than 1 in E19.3)**

**E19.4) How often a year did you usually fast during these periods?**

**E19.5) How old were you when you stopped fasting?**

I still currently fast

Please enter your age when you last fasted if not currently fasting

years

months Don't know

### 3 – Night Eating Syndrome Questionnaire (NES-Q)

The following questions are about your daily routines and mealtimes

If you are concerned about answering these questions, it may be preferable to fill out this survey in the presence of someone who is able to give you support (e.g. a friend or family member).

Information on where to find help for the issues covered in this questionnaire is given at the end of the survey.

1) What time do you usually go to bed in the evening (turn out the lights in order to sleep)?

\_\_\_PM

\_\_\_AM

2.) What time do you usually get out of bed in the morning?

\_\_\_PM

\_\_\_AM

3.) On most days, do you experience loss of appetite in the morning?

Yes

No

4.) How often do you typically eat breakfast (after your final morning awakening)?

\_\_\_\_\_ times a week

5.) What time do you usually have the first meal of the day?

\_\_\_ AM/PM

6.) What percentage (%) of food do you generally eat after 19:00, as a percentage?

\_\_\_\_\_%

7.) What time do you usually have your evening meal?

\_\_\_PM

\_\_\_AM

8.) How much food do you generally eat after your evening meal, as a percentage (%)?

\_\_\_\_\_ %

**8a.) For how long have you been consuming at least this much after your evening meal?**

\_\_\_\_\_ years

\_\_\_\_\_ months

**9.) On most days, do you have a strong urge to eat between dinner and sleep onset and/or during the night?**

Yes

No

**10.) Do you have trouble falling asleep at night?**

Yes

No

If participant answers YES in Q10, follow to Q10a

**10a.) How many times each week do you have trouble falling asleep at night?**

Drop down menu 1-7,

None

**11. Do you have trouble staying asleep at night?**

Yes

No

If participant answers YES in Q11, continue to question Q11a and 11b

**11a.) How many times each week do you have trouble staying asleep at night?**

\_\_\_\_\_ times/week

**11b.) How many times each week do you get out of bed during these awakenings?**

\_\_\_\_\_ times/week

**12. How many times each week do you awake from sleep during the night to use the bathroom?**

\_\_\_\_\_ times/week

None

**13. Do you awake from sleep during the night and eat food?**



Yes      No

If participants answer NO, skip to Q14

**13a.) How many times per week do you awake from sleep during the night and eat food?**

\_\_\_\_\_times/week

**13b.) For how long have you been getting up at this frequency to eat?**

\_\_\_\_\_years \_\_\_\_\_months

**13c.) Do you believe you need to eat in order to fall back to sleep when you wake up at nights?**

Yes      No

**13d.) How aware are you of your eating during the night?**

Not at all      Somewhat      Extremely

**13e) How often do you recall your eating during the night the next day?**

Never      Sometimes      Always

**14.) Would you consider yourself a night eater?**

Yes      No

If participant answers NO, skip to Q15.

**14a.) How upset are you about your night eating?**

Not at all      Somewhat      Extremely

**14b.) How much has your eating at night impaired your functioning and/or interfered with your daily life?**

Not at all      Somewhat      Extremely

**14c.) For how long have you been experiencing this night eating behaviour?**

\_\_\_\_\_months

\_\_\_\_\_years

**15.) Do you have sleep apnea?**

Yes       No       Don't know

**16.) Do you work an evening or night shift?**

Yes       No

If participant answers YES, continue to Q16a and Q16b.

**16a. What type of shift do you work?**

Evening       Night       Rotating       Other

**16b. For how long have you been working this shift?**

\_\_\_\_\_years

\_\_\_\_\_months

**17. Have you been feeling depressed or down nearly every day?**

Yes       No

**18. In general, when you are feeling depressed or down, is your mood lower in the:**

Morning       Afternoon       Evening/Nighttime       Not applicable

**19. Are you currently dieting to lose weight?**

Yes       No

**20. What is your current height and weight (without clothing or shoes)?**

\_\_\_\_\_ height (inch/cm)

\_\_\_\_\_ weight (lbs/kgs/st/bmi)

## 4 – Muscle Dysmorphic Disorder Inventory

The following questions relate to exercise and how you feel about your body

Please read through the following questions and fill in the circle that best indicates how you typically think, feel, or behave.

(This section will only be displayed to participants who select ‘male’ in question 2 or who select ‘male’ in question 2.1 in the demographics section)

|                                                                                     | Never                    | Rarely                   | Occasionally             | Frequently               | Always                   |
|-------------------------------------------------------------------------------------|--------------------------|--------------------------|--------------------------|--------------------------|--------------------------|
| 1) I think my body is too <u>small</u>                                              | <input type="checkbox"/> | <input type="checkbox"/> | <input type="checkbox"/> | <input type="checkbox"/> | <input type="checkbox"/> |
| 2) I wear loose clothing so that people <u>can't</u> see my body                    | <input type="checkbox"/> | <input type="checkbox"/> | <input type="checkbox"/> | <input type="checkbox"/> | <input type="checkbox"/> |
| 3) I hate my body                                                                   | <input type="checkbox"/> | <input type="checkbox"/> | <input type="checkbox"/> | <input type="checkbox"/> | <input type="checkbox"/> |
| 4) I wish I could get <u>bigger</u>                                                 | <input type="checkbox"/> | <input type="checkbox"/> | <input type="checkbox"/> | <input type="checkbox"/> | <input type="checkbox"/> |
| 5) I think my chest is too <u>small</u>                                             | <input type="checkbox"/> | <input type="checkbox"/> | <input type="checkbox"/> | <input type="checkbox"/> | <input type="checkbox"/> |
| 6) I think my legs are too <u>thin</u>                                              | <input type="checkbox"/> | <input type="checkbox"/> | <input type="checkbox"/> | <input type="checkbox"/> | <input type="checkbox"/> |
| 7) I feel like I have <u>too much</u> body fat                                      | <input type="checkbox"/> | <input type="checkbox"/> | <input type="checkbox"/> | <input type="checkbox"/> | <input type="checkbox"/> |
| 8) I wish my arms were <u>bigger</u>                                                | <input type="checkbox"/> | <input type="checkbox"/> | <input type="checkbox"/> | <input type="checkbox"/> | <input type="checkbox"/> |
| 9) I am very <u>shy</u> about letting people see me with my shirt off               | <input type="checkbox"/> | <input type="checkbox"/> | <input type="checkbox"/> | <input type="checkbox"/> | <input type="checkbox"/> |
| 10) I feel <u>anxious</u> when I miss one or more workout days.                     | <input type="checkbox"/> | <input type="checkbox"/> | <input type="checkbox"/> | <input type="checkbox"/> | <input type="checkbox"/> |
| 11) I pass up <u>social activities</u> with friends because of my workout schedule. | <input type="checkbox"/> | <input type="checkbox"/> | <input type="checkbox"/> | <input type="checkbox"/> | <input type="checkbox"/> |
| 12) I feel <u>depressed</u> when I miss one or more workout days.                   | <input type="checkbox"/> | <input type="checkbox"/> | <input type="checkbox"/> | <input type="checkbox"/> | <input type="checkbox"/> |
| 13) I pass up chances to <u>meet new people</u> because of my workout schedule.     | <input type="checkbox"/> | <input type="checkbox"/> | <input type="checkbox"/> | <input type="checkbox"/> | <input type="checkbox"/> |

## 5 – Avoidant/restrictive Food Intake Disorder Screener

The following questions are about your food intake experiences.

If you are concerned about answering these questions, it may be preferable to fill out this survey in the presence of someone who is able to give you support (e.g. a friend or family member).

Information on where to find help for the issues covered in this questionnaire is given at the end of the survey.

|                                                                                                                                        | Strongly Disagree        | Disagree                 | Slightly Disagree        | Slightly Agree           | Agree                    | Strongly Agree           |
|----------------------------------------------------------------------------------------------------------------------------------------|--------------------------|--------------------------|--------------------------|--------------------------|--------------------------|--------------------------|
| 1) I am a picky eater                                                                                                                  | <input type="checkbox"/> | <input type="checkbox"/> | <input type="checkbox"/> | <input type="checkbox"/> | <input type="checkbox"/> | <input type="checkbox"/> |
| 2) I dislike most of the foods that other people eat                                                                                   | <input type="checkbox"/> | <input type="checkbox"/> | <input type="checkbox"/> | <input type="checkbox"/> | <input type="checkbox"/> | <input type="checkbox"/> |
| 3) The list of foods that I like and will eat is shorter than the list of foods I won't eat                                            | <input type="checkbox"/> | <input type="checkbox"/> | <input type="checkbox"/> | <input type="checkbox"/> | <input type="checkbox"/> | <input type="checkbox"/> |
| 4) I am not very interested in eating; I seem to have a smaller appetite than other people                                             | <input type="checkbox"/> | <input type="checkbox"/> | <input type="checkbox"/> | <input type="checkbox"/> | <input type="checkbox"/> | <input type="checkbox"/> |
| 5) I have to push myself to eat regular meals throughout the day, or to eat a large enough amount of food at meals                     | <input type="checkbox"/> | <input type="checkbox"/> | <input type="checkbox"/> | <input type="checkbox"/> | <input type="checkbox"/> | <input type="checkbox"/> |
| 6) Even when I am eating a food I really like, it is hard for me to eat a large volume at meals                                        | <input type="checkbox"/> | <input type="checkbox"/> | <input type="checkbox"/> | <input type="checkbox"/> | <input type="checkbox"/> | <input type="checkbox"/> |
| 7) I avoid or put off eating because I am afraid of gastrointestinal discomfort, choking, or vomiting                                  | <input type="checkbox"/> | <input type="checkbox"/> | <input type="checkbox"/> | <input type="checkbox"/> | <input type="checkbox"/> | <input type="checkbox"/> |
| 8) I restrict myself to certain foods because I am afraid that other foods will cause gastrointestinal discomfort, choking or vomiting | <input type="checkbox"/> | <input type="checkbox"/> | <input type="checkbox"/> | <input type="checkbox"/> | <input type="checkbox"/> | <input type="checkbox"/> |
| 9) I eat small portions because I am afraid of gastrointestinal discomfort, choking or vomiting.                                       | <input type="checkbox"/> | <input type="checkbox"/> | <input type="checkbox"/> | <input type="checkbox"/> | <input type="checkbox"/> | <input type="checkbox"/> |

## 6 – Childhood Trauma and Possible Stresses and Strains of Life

This section asks about your childhood and some possible stresses and strains of life. If this is too difficult, then *please skip to section 7 on page 47.*

|                                                                                           | 1<br>Never<br>true       | 2<br>Rarely<br>true      | 3<br>Sometime<br>s true  | 4<br>Often               | 5<br>Very<br>often<br>true | 6<br>Prefer<br>not to<br>answer |
|-------------------------------------------------------------------------------------------|--------------------------|--------------------------|--------------------------|--------------------------|----------------------------|---------------------------------|
| <b>F1) When I was growing up...</b>                                                       |                          |                          |                          |                          |                            |                                 |
| a. I felt <u>loved</u>                                                                    | <input type="checkbox"/> | <input type="checkbox"/> | <input type="checkbox"/> | <input type="checkbox"/> | <input type="checkbox"/>   | <input type="checkbox"/>        |
| b. People in my family hit me so hard that it left me with <u>bruises</u> or <u>marks</u> | <input type="checkbox"/> | <input type="checkbox"/> | <input type="checkbox"/> | <input type="checkbox"/> | <input type="checkbox"/>   | <input type="checkbox"/>        |
| c. I felt that someone in my family <u>hated</u> me                                       | <input type="checkbox"/> | <input type="checkbox"/> | <input type="checkbox"/> | <input type="checkbox"/> | <input type="checkbox"/>   | <input type="checkbox"/>        |
| d. Someone molested me (sexually)                                                         | <input type="checkbox"/> | <input type="checkbox"/> | <input type="checkbox"/> | <input type="checkbox"/> | <input type="checkbox"/>   | <input type="checkbox"/>        |
| e. There was someone to take me to the doctor if I needed it                              | <input type="checkbox"/> | <input type="checkbox"/> | <input type="checkbox"/> | <input type="checkbox"/> | <input type="checkbox"/>   | <input type="checkbox"/>        |

|                                                                                                    | 1<br>Never               | 2<br>Yes, but not<br>in the last<br>12 months | 3<br>Yes, within<br>the last 12<br>months | 4<br>Prefer not<br>to answer |
|----------------------------------------------------------------------------------------------------|--------------------------|-----------------------------------------------|-------------------------------------------|------------------------------|
| <b>F2) Since I was sixteen...</b>                                                                  |                          |                                               |                                           |                              |
| a. I have been in a <u>confiding</u> relationship                                                  | <input type="checkbox"/> | <input type="checkbox"/>                      | <input type="checkbox"/>                  | <input type="checkbox"/>     |
| b. A partner or ex-partner <u>deliberately</u> hit me or used violence in any other way            | <input type="checkbox"/> | <input type="checkbox"/>                      | <input type="checkbox"/>                  | <input type="checkbox"/>     |
| c. A partner or ex-partner repeatedly belittled me to the extent that I felt worthless             | <input type="checkbox"/> | <input type="checkbox"/>                      | <input type="checkbox"/>                  | <input type="checkbox"/>     |
| d. A partner or ex-partner sexually interfered with me, or forced me to have sex against my wishes | <input type="checkbox"/> | <input type="checkbox"/>                      | <input type="checkbox"/>                  | <input type="checkbox"/>     |
| e. I have had the money to pay my rent/mortgage payment                                            | <input type="checkbox"/> | <input type="checkbox"/>                      | <input type="checkbox"/>                  | <input type="checkbox"/>     |

**F2a) If so, how often have these statements been true?**

|  | 1<br>Never<br>true | 2<br>Rarely<br>true | 3<br>Sometime<br>s true | 4<br>Often | 5 | 6 |
|--|--------------------|---------------------|-------------------------|------------|---|---|
|  |                    |                     |                         |            |   |   |

|                                                                                                    |                          |                          |                          |                          | Very often true          | Prefer not to answer     |
|----------------------------------------------------------------------------------------------------|--------------------------|--------------------------|--------------------------|--------------------------|--------------------------|--------------------------|
| a. I have been in a <u>confiding</u> relationship                                                  | <input type="checkbox"/> | <input type="checkbox"/> | <input type="checkbox"/> | <input type="checkbox"/> | <input type="checkbox"/> | <input type="checkbox"/> |
| b. A partner or ex-partner <u>deliberately</u> hit me or used violence in any other way            | <input type="checkbox"/> | <input type="checkbox"/> | <input type="checkbox"/> | <input type="checkbox"/> | <input type="checkbox"/> | <input type="checkbox"/> |
| c. A partner or ex-partner repeatedly belittled me to the extent that I felt worthless             | <input type="checkbox"/> | <input type="checkbox"/> | <input type="checkbox"/> | <input type="checkbox"/> | <input type="checkbox"/> | <input type="checkbox"/> |
| d. A partner or ex-partner sexually interfered with me, or forced me to have sex against my wishes | <input type="checkbox"/> | <input type="checkbox"/> | <input type="checkbox"/> | <input type="checkbox"/> | <input type="checkbox"/> | <input type="checkbox"/> |
| e. I have had the money to pay my rent/mortgage payment                                            | <input type="checkbox"/> | <input type="checkbox"/> | <input type="checkbox"/> | <input type="checkbox"/> | <input type="checkbox"/> | <input type="checkbox"/> |

|                                                                                               | 1<br>Never               | 2<br>Yes, but not in the last 12 months | 3<br>Yes, within the last 12 months | 4<br>Prefer not to answer |
|-----------------------------------------------------------------------------------------------|--------------------------|-----------------------------------------|-------------------------------------|---------------------------|
| <b>F3) In your life, have you...?</b>                                                         |                          |                                         |                                     |                           |
| a. Been a victim of a sexual assault, whether by a stranger or someone you knew               | <input type="checkbox"/> | <input type="checkbox"/>                | <input type="checkbox"/>            | <input type="checkbox"/>  |
| b. Been attacked, mugged, robbed, or been the victim of a physically violent crime            | <input type="checkbox"/> | <input type="checkbox"/>                | <input type="checkbox"/>            | <input type="checkbox"/>  |
| c. Been in a serious accident that you believed to be life-threatening at the time            | <input type="checkbox"/> | <input type="checkbox"/>                | <input type="checkbox"/>            | <input type="checkbox"/>  |
| d. Witnessed a sudden violent death (e.g., murder, suicide, aftermath of an accident)         | <input type="checkbox"/> | <input type="checkbox"/>                | <input type="checkbox"/>            | <input type="checkbox"/>  |
| e. Been diagnosed with a life-threatening illness                                             | <input type="checkbox"/> | <input type="checkbox"/>                | <input type="checkbox"/>            | <input type="checkbox"/>  |
| f) Been involved in combat or exposed to a war-zone (either in the military or as a civilian) | <input type="checkbox"/> | <input type="checkbox"/>                | <input type="checkbox"/>            | <input type="checkbox"/>  |

**F4) Next is a list of problems and complaints that people sometimes have in response to such extremely stressful experiences. Please indicate how much you have been bothered by that problem in the past month:**

|  | 1<br>Not at all | 2<br>A little bit | 3<br>Moderately | 4<br>Quite a bit | 5<br>Extremely | 6<br>Prefer not to answer |
|--|-----------------|-------------------|-----------------|------------------|----------------|---------------------------|
|  |                 |                   |                 |                  |                |                           |

|                                                                                           |                          |                          |                          |                          |                          |                          |
|-------------------------------------------------------------------------------------------|--------------------------|--------------------------|--------------------------|--------------------------|--------------------------|--------------------------|
| a. Repeated, disturbing memories, thoughts, or images of a stressful experience?          | <input type="checkbox"/> | <input type="checkbox"/> | <input type="checkbox"/> | <input type="checkbox"/> | <input type="checkbox"/> | <input type="checkbox"/> |
| b. Feeling very upset when something reminded you of a stressful experience?              | <input type="checkbox"/> | <input type="checkbox"/> | <input type="checkbox"/> | <input type="checkbox"/> | <input type="checkbox"/> | <input type="checkbox"/> |
| c. Avoiding activities or situations because they reminded you of a stressful experience? | <input type="checkbox"/> | <input type="checkbox"/> | <input type="checkbox"/> | <input type="checkbox"/> | <input type="checkbox"/> | <input type="checkbox"/> |
| d. Feeling distant or cut off from other people?                                          | <input type="checkbox"/> | <input type="checkbox"/> | <input type="checkbox"/> | <input type="checkbox"/> | <input type="checkbox"/> | <input type="checkbox"/> |
| e. Feeling irritable or having angry outbursts?                                           | <input type="checkbox"/> | <input type="checkbox"/> | <input type="checkbox"/> | <input type="checkbox"/> | <input type="checkbox"/> | <input type="checkbox"/> |
| f. Difficulty concentrating?                                                              | <input type="checkbox"/> | <input type="checkbox"/> | <input type="checkbox"/> | <input type="checkbox"/> | <input type="checkbox"/> | <input type="checkbox"/> |

## 7 – General info/Study Feedback

These questions relate to the questionnaire you have just answered

1) How did you find the length of the questionnaire?

- Too brief
  About right  
 Too long

2) How did you find completing the questionnaire?

- Not at all enjoyable
  Moderately enjoyable  
 Very enjoyable

3) Have you previously participated in the UK Biobank?

- Yes (*Continue to 3a*)
  No (*Skip to 4*)  
 Don't know (*Skip to 4*)

3a) Did you complete the UK Biobank Mental Health Questionnaire?

- Yes
  No  
 Don't know

4) How did you hear about the EDGI? (*Please select all that apply*)

- |                                                                           |                                                                                  |
|---------------------------------------------------------------------------|----------------------------------------------------------------------------------|
| <input type="checkbox"/> Facebook <i>(continue to question 4.1)</i>       | <input type="checkbox"/> Newspaper <i>(skip to question 4.8)</i>                 |
| <input type="checkbox"/> Twitter <i>(skip to question 4.2)</i>            | <input type="checkbox"/> Online tabloid <i>(skip to question 4.9)</i>            |
| <input type="checkbox"/> Blogger <i>(skip to question 4.3)</i>            | <input type="checkbox"/> Word of mouth <i>(skip to question 4.10)</i>            |
| <input type="checkbox"/> Other social media <i>(skip to question 4.4)</i> | <input type="checkbox"/> Employer or organisation <i>(skip to question 4.11)</i> |
| <input type="checkbox"/> Search engine <i>(skip to question 4.5)</i>      | <input type="checkbox"/> Beat Eating Disorders <i>(skip to question 5)</i>       |
| <input type="checkbox"/> Radio <i>(skip to question 4.6)</i>              | <input type="checkbox"/> Other Charity <i>(skip to question 4.12)</i>            |
| <input type="checkbox"/> TV <i>(skip to question 4.7)</i>                 | <input type="checkbox"/> Clinician/GP <i>(skip to question 5)</i>                |
|                                                                           | <input type="checkbox"/> Other <i>(skip to question 4.13)</i>                    |

**4.1) How did you hear about the EDGI through Facebook? *(Please select all that apply)***

- |                                                                                    |                                                                                   |
|------------------------------------------------------------------------------------|-----------------------------------------------------------------------------------|
| <input type="checkbox"/> Friends/family <i>(skip to question 5)</i>                | <input type="checkbox"/> Charity <i>(skip to question 4.1b)</i>                   |
| <input type="checkbox"/> Promoted posts/advertisements <i>(skip to question 5)</i> | <input type="checkbox"/> EDGI study Facebook page <i>(skip to question 5)</i>     |
| <input type="checkbox"/> Celebrity <i>(continue to question 4.1a)</i>              | <input type="checkbox"/> Online tabloid/news posts <i>(skip to question 4.1c)</i> |

**4.1.1) Which celebrity did you hear about the EDGI from?**

---

**4.1.2) Which charity did you hear about the EDGI from?**

---

**4.1.3) Which online tabloid/newspaper did you hear about the EDGI from?**

---

**4.2) How did you hear about the EDGI through twitter? *(Please select all that apply)***

- |                                                                                    |                                                                                   |
|------------------------------------------------------------------------------------|-----------------------------------------------------------------------------------|
| <input type="checkbox"/> Friends/family <i>(skip to question 5)</i>                | <input type="checkbox"/> Charity <i>(skip to question 4.2b)</i>                   |
| <input type="checkbox"/> Promoted posts/advertisements <i>(skip to question 5)</i> | <input type="checkbox"/> EDGI study Facebook page <i>(skip to question 5)</i>     |
| <input type="checkbox"/> Celebrity <i>(continue to question 4.2a)</i>              | <input type="checkbox"/> Online tabloid/news posts <i>(skip to question 4.2c)</i> |

**4.2.1) Which celebrity did you hear about the EDGI from?**

---

**4.2.2) Which charity did you hear about the EDGI from?**

---

**4.2.3) Which online tabloid/newspaper did you hear about the EDGI from?**

---



4.3) Which **blogger** did you hear about the **EDGI** from?

---

4.4) Which **other social media** did you hear about the **EDGI** from?

---

4.5) On which **search engine** did you hear about the **EDGI** from?

- |                                                             |                                                                    |
|-------------------------------------------------------------|--------------------------------------------------------------------|
| <input type="checkbox"/> Google <i>(skip to question 5)</i> | <input type="checkbox"/> AOL <i>(skip to question 5)</i>           |
| <input type="checkbox"/> Bing <i>(skip to question 5)</i>   | <input type="checkbox"/> MSN <i>(skip to question 5)</i>           |
| <input type="checkbox"/> Yahoo <i>(skip to question 5)</i>  | <input type="checkbox"/> DuckDuckGo <i>(skip to question 5)</i>    |
| <input type="checkbox"/> Ask <i>(skip to question 5)</i>    | <input type="checkbox"/> Other <i>(continue to question 4.5.1)</i> |

4.5.1) On which **other search engine** did you hear about the **EDGI** from?

---

4.6) On which **radio station/show(s)** did you hear about the **EDGI** from?

---

4.7) On which **TV channel/show(s)** did you hear about the **EDGI** from?

---

4.8) In which **newspaper(s)** did you hear about the **EDGI** from?

---

4.9) In which **online tabloid(s)** did you hear about the **EDGI** from?

---

4.10) Who did you hear about the **EDGI** from?

- |                                                                   |                                                             |
|-------------------------------------------------------------------|-------------------------------------------------------------|
| <input type="checkbox"/> Friend(s) <i>(skip to question 5)</i>    | <input type="checkbox"/> Family <i>(skip to question 5)</i> |
| <input type="checkbox"/> Colleague(s) <i>(skip to question 5)</i> | <input type="checkbox"/> Other <i>(skip to question 5)</i>  |

4.11) Which **employer/organisation** did you hear about the **EDGI** from?

---

4.12) Which **charity** did you hear about the **EDGI** from?

---

4.13) Please tell us more about how you heard about the **EDGI** from?

5) Is there any other information you would like to share that relates to this study?

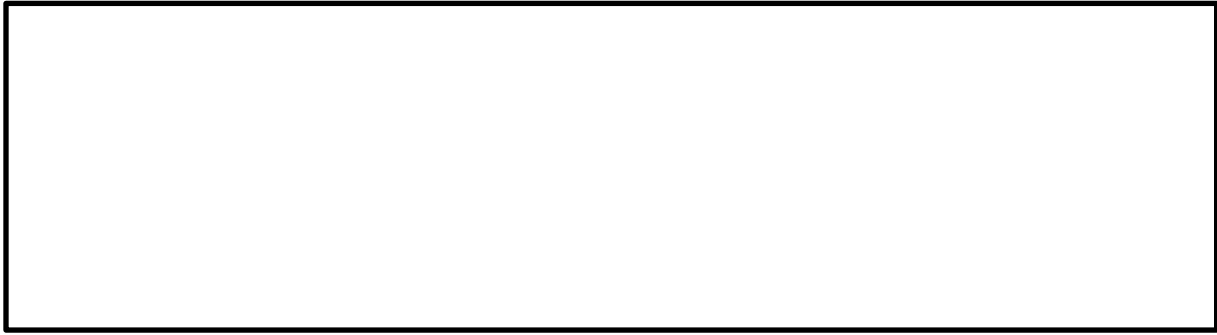

---

**If you wish to find out more information about this questionnaire, you can contact one of the EDGI researchers on Freephone 0800 917 6016**

If you feel you need any further help with the issues in this questionnaire, we recommend talking it through with someone you trust, including your GP. For more information and support please visit MIND.

If you would like to speak with a trained support worker who can offer help and information on dealing with eating disorders, please contact the Beat helpline at 0808 801 0677 which is open everyday from 12pm-8pm during the week, and 4pm-8pm on weekends and bank holiday.

If you are in distress and need urgent help or advice, please contact someone as soon as possible, such as the Samaritans on 116 123 (or see their website) or the SLaM 24-hour mental health support line on 0800 731 2864 (or visit here).

**Thank you very much for taking the time to complete this questionnaire.**

We are now assessing your eligibility to take part in the EDGI study. If you are eligible, you will receive your saliva kit in the post in the next 10-15 working days.

In the meantime, please feel free to visit the [optional projects page](#) where you can complete a variety of additional questionnaires about your experiences with mental and physical health.

Please continue by pressing the next arrow below

**Please note that you will not be automatically directed away from this page, but your survey response has been submitted.**
